# Supplementary material
Source: MDPI journal article supplement (https://www.mdpi.com/2076-3417/12/10/4974)
Supplement: s1 [file s1]

Table S1: Areas sampled to assess *Stenocarpella* spp. inoculum.

| Field | Crop Rotation         | System <sup>1</sup>           | City                   | Stalk <sup>2</sup> | Coordinate                |
|-------|-----------------------|-------------------------------|------------------------|--------------------|---------------------------|
| 1     | Maize-Soybean         | No-tillage/CR                 | Madre de Deus de Minas | D                  | 21°24'15"S/<br>44°13'08"W |
| 2     | Maize-Soybean         |                               |                        | P                  | 21°24'15"S/<br>44°13'08"W |
| 3     | Maize-Bean-Soybean    |                               |                        | D                  | 21°26'5"S/ 44°14'11"W     |
| 4     | Maize-Soybean         |                               |                        | E                  | 21°39'32"S/<br>44°32'58"W |
| 5     | Maize-Bean            |                               |                        | P                  | 44°32'58"W                |
| 6     | Maize-Soybean         | No-tillage/CR                 | Piedade do Rio Grande  | E                  | 21°23'14"S/<br>44°10'31"W |
| 7     | Soybean-Maize-Soybean | No-tillage/CR                 | São Vicente de Minas   | P                  | 21°39'32"S/<br>44°32'58"W |
| 8     | Soybean-Maize-Soybean |                               |                        | E                  |                           |
| 9     | Maize-Wheat-Soybean   | No-tillage/CR                 | Minduri                | P                  | 21°39'32"S/<br>44°32'58"W |
| 10    | Maize-Maize           | No-tillage/M                  |                        | E                  | 21°39'32"S/<br>44°32'58"W |
| 11    | Maize-Maize           | No-tillage/M                  | Cruzília               | E                  | 21°42'46"S/<br>44°47'52"W |
| 12    | Maize-Wheat-Maize     | No-tillage/CR                 | Conceição do Rio Verde | E                  | 21°56'32"S/<br>45°02'59"W |
| 13    | Soybean-Wheat-Maize   |                               |                        | P                  | 21°55'45"S/<br>45°07'08"W |
| 14    | Maize-Maize           | No-tillage/CR<br>Conventional | Nepomuceno             | E                  | 21°14'22"S/<br>45°19'08"W |
| 15    | Maize-Bean            |                               |                        | D<br>D             | 21°15'22"S/<br>45°20'24"W |
| 16    | Maize-Soybean         | No-tillage/CR                 | Boa Esperança          | P                  | 21°14'47"S/<br>45°21'16"W |
| 17    | Maize-Maize           | No-tillage/M                  |                        | E                  | 21°09'50"S/<br>45°33'56"W |
| 18    | Maize-Soybean         | No-tillage/CR                 |                        | P                  |                           |
| 19    | Maize-Maize           | No-tillage/M                  | Campos Gerais          | D                  | 21°17'37"S/<br>45°49'28"W |
| 20    | Maize-Soybean         | No-tillage/CR                 |                        | D                  | 21°17'53"S/<br>45°50'09"W |
| 21    | Maize-Maize           | No-tillage/M                  | Alfenas                | D                  | 21°38'26"S/<br>45°54'03"W |
| 22    | Maize-Soybean         | No-tillage/CR                 | Machado                | E                  | 21°40'52"S/<br>45°51'27"W |
| 23    | Maize-Maize           | No-tillage/M                  | Carmo da Cachoeira     | E                  | 21°32'56"S/<br>45°14'05"W |

|    |               |               |            |   |                           |
|----|---------------|---------------|------------|---|---------------------------|
| 24 | Maize-Maize   | Conventional  | Campo Belo | D | 20°52'50"S/<br>45°15'38"W |
| 25 | Maize-Soybean | No-tillage/CR | Arcos      | D | 20°23'21"S/<br>45°31'16"W |
| 26 | Maize-Maize   | No-tillage/M  |            | P | 20°23'06"S/<br>45°30'33"W |
| 27 | Maize-Soybean | No-tillage/CR | BambuÍ     | D | 20°03'04"S/<br>45°53'57"W |
| 28 | Maize-Soybean |               |            | E | 19°53'55"S/<br>45°58'34"W |
| 29 | Maize-Soybean | No-tillage/CR | Iguatama   | D | 20°08'29"S/<br>45°44'13"W |

<sup>1</sup>CR - crop rotation, M - monoculture; <sup>2</sup>Stalks size: D-disintegrated, P- partially disintegrated and E-entire
